# ***$\gamma$ -Amino Butyric Acid Type A Receptor Mutations at $\beta$ 2N265 Alter Etomidate Efficacy While Preserving Basal and Agonist-dependent Activity***

Rooma Desai, Ph.D.,\* Dirk Ruesch, M.D.,† Stuart A. Forman, M.D., Ph.D.‡

**Background:** Etomidate acts at  $\gamma$ -Aminobutyric acid type A (GABA<sub>A</sub>) receptors containing  $\beta$ 2 or  $\beta$ 3, but not  $\beta$ 1 subunits. Mutations at  $\beta$  residue 265 (Ser in  $\beta$ 1; Asn in  $\beta$ 2 or  $\beta$ 3) profoundly affect etomidate sensitivity. Whether these mutations alter etomidate binding remains uncertain.

**Methods:** Heterologously expressed  $\alpha$ 1 $\beta$ 2 $\gamma$ 2L GABA<sub>A</sub> receptors and receptors with  $\beta$ 2(N265S) or  $\beta$ 2(N265M) mutations were studied electrophysiologically in both *Xenopus* oocytes and HEK293 cells. Experiments quantified the impact of  $\beta$ 2N265 mutations or substituting  $\beta$ 1 for  $\beta$ 2 on basal channel activation, GABA EC<sub>50</sub>, maximal GABA efficacy, etomidate-induced leftward shift in GABA responses, etomidate direct activation, and rapid macrocurrent kinetics. Results were analyzed in the context of an established allosteric coagonist mechanism.

**Results:** Mutations produced only small changes in basal channel activity, GABA EC<sub>50</sub>, maximal GABA efficacy, and macrocurrent kinetics. Relative to wild-type,  $\beta$ 2(N265S) reduced etomidate enhancement of apparent GABA affinity six-fold, and it reduced etomidate direct activation efficacy 14-fold.  $\beta$ 2(N265M) totally eliminated both etomidate modulation of GABA responses and direct channel activation. Mechanism-based analysis showed that the function of both mutants remains consistent with the allosteric coagonist model and that  $\beta$ 2(N265S) reduced etomidate allosteric efficacy five-fold, whereas etomidate-binding affinity dropped threefold. Experiments swapping  $\beta$ 2 subunits for  $\beta$ 1 indicated that etomidate efficacy is reduced 34-fold, whereas binding affinity drops less than two-fold.

**Conclusions:** Mutations at  $\beta$ 2N265 profoundly alter etomidate sensitivity with only small changes in basal and GABA-dependent channel activity. Mutations at the  $\beta$ 2N265 residue or replacement of  $\beta$ 2 with  $\beta$ 1 influence etomidate efficacy much more than binding to inactive receptors.

ETOMIDATE is a potent intravenous general anesthetic that produces its behavioral effects *via* ionotropic  $\gamma$ -Aminobutyric acid type A (GABA<sub>A</sub>) receptors, the major inhibitory postsynaptic ion channels in mammalian brain.<sup>1,2</sup> Etomidate slows decay of GABAergic inhibitory postsynaptic currents in neurons and similarly slows deactivation of GABA<sub>A</sub> receptor-mediated macrocurrents

elicited with brief agonist pulses.<sup>3,4</sup> Etomidate potentiates currents elicited by submaximal GABA, shifting GABA EC<sub>50</sub> to lower concentrations. High concentrations of etomidate also directly activate GABA<sub>A</sub> receptors. In  $\alpha$ 1 $\beta$ 2 $\gamma$ 2L GABA<sub>A</sub> receptors, these etomidate actions are quantitatively described by an allosteric model with two equivalent coagonist sites linked to channel gating.<sup>5</sup>

GABA<sub>A</sub> receptors contain a central chloride ion channel surrounded by five homologous subunits, each with a large amino-terminal extracellular domain, four transmembrane domains (M1–M4), and a large intracellular domain between M3 and M4.<sup>6</sup> The most abundant GABA<sub>A</sub> receptor subtype,  $\alpha$ 1 $\beta$ 2 $\gamma$ 2L, incorporates 2 $\alpha$ , 2 $\beta$ , and 1 $\gamma$  arranged counterclockwise as  $\gamma$ - $\beta$ - $\alpha$ - $\beta$ - $\alpha$  when viewed from the synaptic cleft.<sup>7–9</sup> Photolabeling with an etomidate analog, [<sup>3</sup>H]-azi-etomidate,<sup>10,11</sup> identified two GABA<sub>A</sub> receptor residues on adjacent subunits, M286 in the  $\beta$  subunit M3 domain and M236 in the  $\alpha$  subunit M1 domain.

The amino acid at position 265 (15') in the M2 domain of  $\beta$  subunits is also a determinant of etomidate sensitivity. Etomidate modulates mammalian GABA<sub>A</sub> receptors containing  $\beta$ 2 or  $\beta$ 3 subunits, which both have Asn (N) at position 265, while minimally affecting receptors containing  $\beta$ 1 subunits, which have Ser (S) at position 265.<sup>12</sup> Ser substitutions for Asn265 in  $\beta$ 2 and  $\beta$ 3 reduce etomidate sensitivity, whereas receptors containing mutant  $\beta$ 1(S265N) subunits become etomidate sensitive.<sup>13–15</sup> In addition, the homolog of  $\beta$ 2/3(N265) in the anesthetic-insensitive *drosophila rdl* GABA<sub>A</sub> receptor is a Met (M), and mutation of  $\beta$ 2/3N265 to Met also dramatically reduces etomidate modulation.<sup>16,17</sup> The  $\beta$ 3(N265M) and  $\beta$ 2(N265S) mutations have been used in transgenic animal studies probing the role of GABA<sub>A</sub> receptors in anesthetic actions *in vivo*.<sup>1,2</sup> Structural models of  $\alpha$ 1 $\beta$ 2 $\gamma$ 2L GABA<sub>A</sub> receptors,<sup>11,18,19</sup> based on a 4-Å resolution structure of the homologous nicotinic acetylcholine receptor from Torpedo,<sup>20</sup> show  $\beta$ 2N265 at the periphery of the etomidate binding pocket.

The aims of this study were to quantitatively define the impact of  $\beta$ 2N265 mutations on  $\alpha$ 1 $\beta$ 2 $\gamma$ 2L GABA<sub>A</sub> receptor function both in the absence and presence of etomidate and also to determine whether mutations at  $\beta$ 2N265 affect etomidate binding *versus* its allosteric efficacy. We assessed the effects of  $\beta$ 2(N265S) and  $\beta$ 2(N265M) mutations on spontaneous channel activity, GABA concentration responses, maximum GABA

\* Research Fellow, ‡ Associate Professor, Department of Anesthesia & Critical Care, Massachusetts General Hospital, Boston, Massachusetts; † Staff Anesthesiologist, Department of Anesthesia & Critical Care, University Hospital Giessen-Marburg, Marburg, Germany.

Received from the Department of Anesthesia & Critical Care, Massachusetts General Hospital, Boston, Massachusetts. Submitted for publication April 10, 2009. Accepted for publication June 19, 2009. Supported by grants P01GM58448 and R01GM66724 from the National Institutes of Health, Bethesda, Maryland, and by the Department of Anesthesia & Critical Care, Massachusetts General Hospital, Boston, Massachusetts.

Address correspondence to Dr. Forman: Department of Anesthesia & Critical Care, Massachusetts General Hospital, Boston, Massachusetts 02114. saforman@partners.org. Information on purchasing reprints may be found at www.anesthesiology.org or on the masthead page at the beginning of this issue. ANESTHESIOLOGY's articles are made freely accessible to all readers, for personal use only, 6 months from the cover date of the issue.

efficacy, etomidate modulation of GABA-dependent activation, and direct channel activation by etomidate in the absence of GABA. Macrocurrent activation, desensitization, and deactivation rates were also measured in wild-type and mutant receptors by using submillisecond GABA concentration jumps. Results were analyzed within the mechanistic framework of allosteric coagonism.<sup>5</sup>

## Materials and Methods

### Animal Use

Female *Xenopus laevis* were housed in a veterinary-supervised environment and used in accordance with local and federal guidelines and with approval from the Massachusetts General Hospital subcommittee on research and animal care (Boston, Massachusetts). Frogs were anesthetized by immersion in ice-cold 0.2% tricaine (Sigma-Aldrich, St. Louis, MO) before mini-laparotomy for oocyte harvest.

### Chemicals

R(+)-Etomidate was obtained from Bedford Laboratories (Bedford, OH). The clinical preparation in 35% propylene glycol was diluted directly into buffer. Previous studies have shown that propylene glycol at the dilutions used for these studies has no effect on GABA<sub>A</sub> receptor function.<sup>5</sup> Picrotoxin was purchased from Sigma-Aldrich and dissolved in electrophysiology buffer (2 mM) by prolonged gentle shaking. Alphaxalone was purchased from MP Biomedical (Solon, OH) and prepared as a stock solution in dimethylsulfoxide. Salts and buffers were purchased from Sigma-Aldrich.

### Molecular Biology

Complementary DNA sequences for human GABA<sub>A</sub> receptor  $\alpha$ 1,  $\beta$ 2,  $\beta$ 1, and  $\gamma$ 2L subunits were cloned into pCDNA3.1 vectors (Invitrogen, Carlsbad, CA). To create expression plasmids for  $\beta$ 2(N265S),  $\beta$ 2(N265M), and  $\alpha$ 1(L264T) mutants, oligonucleotide-directed mutagenesis was performed on the appropriate wild-type clone using QuickChange kits (Stratagene, La Jolla, CA). Clones from each mutagenesis reaction were sequenced through the entire subunit gene to confirm the presence of the mutation and absence of stray mutations.

### Expression of GABA<sub>A</sub> Receptors

Messenger RNA was synthesized *in vitro* from linearized DNA templates and purified using commercial kits (Ambion Inc., Austin, TX). Subunit messenger RNAs were mixed at 1 $\alpha$ :1 $\beta$  and at least two-fold excess  $\gamma$  to promote homogeneous receptor expression.<sup>21,22</sup> *Xenopus* oocytes were microinjected with 25–50 nl (15–25 ng) of messenger RNA mixture and incubated at 18°C in ND96 (in mM: 96 NaCl, 2 KCl, 0.8 MgCl<sub>2</sub>, 1.8 CaCl<sub>2</sub>, 5

HEPES, pH 7.5) supplemented with gentamicin (0.05 mg/ml) for 24–48 h before electrophysiology. HEK293 cells were cultured on glass cover slips, maintained as previously described,<sup>23</sup> and transfected with plasmids encoding GABA<sub>A</sub> receptor subunit mixtures (1 $\alpha$ :1 $\beta$ :2 $\gamma$ ) using lipofectamine (Invitrogen). A eukaryotic green fluorescent protein expression plasmid, pmaxGFP (Amaxa, Gaithersburg, MD), was mixed with the GABA<sub>A</sub> receptor subunit plasmids to aid in identification of transfected cells. Transfected cells were maintained in culture medium for 24–48 h before electrophysiology experiments.

### Oocyte Electrophysiology

GABA<sub>A</sub> receptor responses to GABA were assessed in *Xenopus* oocytes using two-microelectrode voltage clamp electrophysiology, as previously described.<sup>24</sup> GABA pulses were from 5 to 20 s, depending on the concentration of GABA used and the time to steady-state peak current. Normalizing GABA responses were recorded at maximal GABA (1–10 mM). Picrotoxin-sensitive leak currents were measured by superfusion with 2 mM picrotoxin, followed by washout for at least 5 min before testing maximal GABA response. Alphaxalone (2  $\mu$ M) was used as a gating enhancer in combination with 10 mM GABA to provide estimates of GABA efficacy. Oocyte currents were low-pass filtered at 1 kHz (Model OC-725B, Warner Instruments, Hamden, CT) and digitized at 1–2 kHz using commercial digitizer hardware (Digidata 1200; Molecular Devices, Sunnyvale, CA) and software (pClamp 7; Molecular Devices).

### Electrophysiology in HEK293 Cell Membrane Patches

Excised outside-out membrane patches were voltage-clamped at –50 mV, and current recordings were performed at room temperature (21–23°C) as previously described.<sup>23</sup> Bath and superfusion solutions contained (in mM) 145 NaCl, 5 KCl, 10 HEPES, 2 CaCl<sub>2</sub>, and 1 MgCl<sub>2</sub> at pH 7.4 (pH adjusted with *N*-methyl glucosamine). The intracellular (pipette) fluid contained (in mM) 140 KCl, 10 HEPES, 1 EGTA, and 2 MgCl<sub>2</sub> at pH 7.3 (pH adjusted with KOH). Currents were stimulated with brief (0.5–1.0 s) pulses of GABA delivered *via* a multichannel superfusion pipette coupled to piezo-electric elements that switched superfusion solutions in under 1 ms. Currents were filtered at 5 kHz and digitized at 10 kHz for offline analysis.

### Data Analysis

Leak-correction and measurement of peak currents were performed offline using Clampfit 8.0 software (Molecular Devices). Peak GABA-activated or etomidate-activated oocyte currents were normalized to maximal GABA-activated currents ( $I_{\text{max}}^{\text{GABA}}$ ) measured in the same cell. Concentration-response curves were assembled

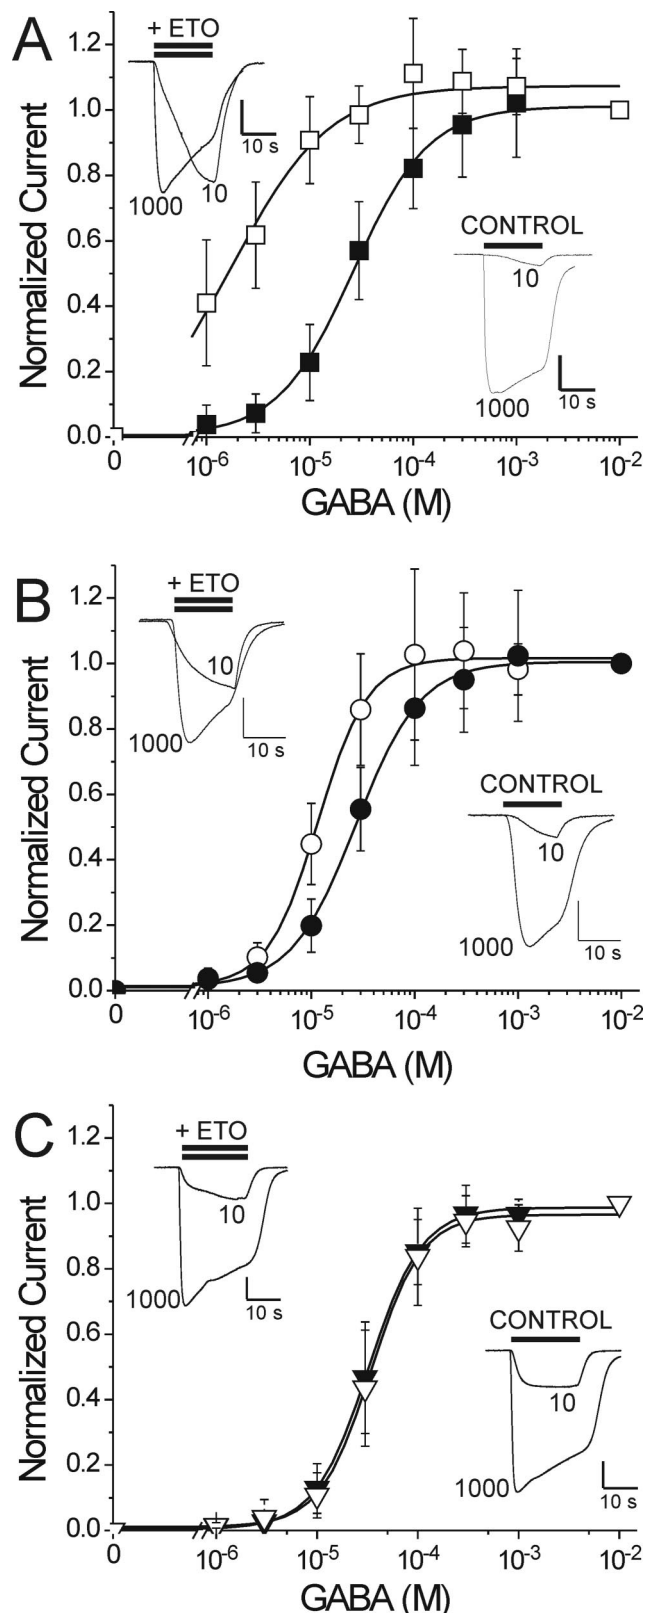

Fig. 1.  $\gamma$ -Aminobutyric acid (GABA) concentration-response curves and etomidate left shifts. Each panel displays mean  $\pm$  SD data for peak GABA-activated oocyte currents normalized to the maximum response. Solid symbols represent control data (no etomidate). Open symbols represent responses measured in the presence of 3.2  $\mu$ M etomidate. Lines through data represent

from pooled normalized data from multiple oocytes. Pooled data sets were fitted with logistic (Hill) functions using nonlinear least squares in Origin 6.1 (OriginLab, Northampton, MA) and Prism 5.02, (GraphPad Software, San Diego, CA):

$$\frac{I}{I_{\max}^{\text{GABA}}} = A \times \frac{[\text{Agonist}]^{\text{nH}}}{[\text{Agonist}]^{\text{nH}} + \text{EC}_{50}^{\text{nH}}} \quad (1)$$

where A is amplitude,  $\text{EC}_{50}$  is the half-maximal activating concentration, and nH is the Hill slope.

Etomidate potentiation of GABA responses was quantified as the ratio of the GABA  $\text{EC}_{50}$  values in the absence of anesthetic to that in the presence of 3.2  $\mu$ M etomidate. GABA concentration-response curves shift leftward (*i.e.*, to a lower GABA  $\text{EC}_{50}$ ) in the presence of etomidate; thus large  $\text{EC}_{50}$  ratios indicate strong modulation, whereas a ratio of 1.0 or less indicates lack of positive modulation.<sup>25</sup>

Picrotoxin-sensitive leak currents ( $I_{\text{PTX}}$ ) were normalized to  $I_{\max}^{\text{GABA}}$ , providing estimates of basal open probability ( $P_0$ ). Incorporation of the  $\alpha 1(\text{L264T})$  mutation was used to enhance basal gating for comparison of the effects of  $\beta 2\text{N265}$  mutations. Maximal GABA efficacy was assessed by first activating oocyte-expressed channels with 10 mM GABA. After full current activation and partial desensitization, superfusate was switched to 10 mM GABA plus 2  $\mu$ M alphaxalone, a strong positive modulator of wild-type and both mutant receptors. Maximal GABA efficacy was calculated as the ratio of current immediately before the addition of alphaxalone ( $I_{\max}^{\text{GABA}}$ ) to the secondary current peak after the addition of alphaxalone ( $I_{\max}^{\text{GABA} + \text{alphax}}$ ).

Estimated open probability ( $P_{\text{open}}^{\text{est}}$ ), defined as the fraction of activatable receptors in the open state, was calculated by explicitly adding spontaneous current and renormalizing to the full range of open probability, assuming that picrotoxin-blocked leak represents no activation ( $P_{\text{open}} = 0$ ) and that maximal GABA plus alphaxalone activates all nondesensitized channels ( $P_{\text{open}} = 1.0$ ).<sup>26</sup> In

nonlinear least squares fits of data to logistic functions. Fitted parameters are reported in table 1. Lower-right insets in each panel display examples of current sweeps elicited with either 10 or 1,000  $\mu$ M GABA in a single oocyte (bars above sweeps indicate application). Upper left insets in each panel display examples of current sweeps recorded from the same oocyte in the presence of etomidate. (A) Wild-type  $\alpha 1\beta 2\gamma 2\text{L}$  (squares). Etomidate strongly potentiates currents at 10  $\mu$ M GABA and induces a large leftward shift in GABA concentration-responses (14-fold reduction in  $\text{EC}_{50}$ ). (B)  $\alpha 1\beta 2(\text{N265S})\gamma 2\text{L}$  (circles). Etomidate weakly potentiates currents elicited with 10  $\mu$ M GABA and induces a small leftward shift in GABA concentration-response (2.3-fold reduction in  $\text{EC}_{50}$ ). (C)  $\alpha 1\beta 2(\text{N265M})\gamma 2\text{L}$  (triangles). Etomidate does not enhance GABA-activated currents and does not significantly shift the GABA concentration-response curve.



**Table 1.**  $\beta$ N265 Mutation Impact on GABA Responses, Etomidate Modulation, and Direct Etomidate Activation of GABA<sub>A</sub> Receptors

| Fitted Parameter‡                      |                                                           | Receptor                   |                                   |                                   |
|----------------------------------------|-----------------------------------------------------------|----------------------------|-----------------------------------|-----------------------------------|
|                                        |                                                           | $\alpha 1\beta 2\gamma 2L$ | $\alpha 1\beta 2(N265S)\gamma 2L$ | $\alpha 1\beta 2(N265M)\gamma 2L$ |
| GABA responses (0 Etomidate)           |                                                           |                            |                                   |                                   |
|                                        | GABA EC <sub>50</sub> , $\mu$ M                           | 26 $\pm$ 1.8               | 27 $\pm$ 1.5                      | 32 $\pm$ 0.9*                     |
|                                        | GABA Hill slope                                           | 1.2 $\pm$ 0.18             | 1.4 $\pm$ 0.15                    | 1.6 $\pm$ 0.07*                   |
| Etomidate modulation of GABA responses |                                                           |                            |                                   |                                   |
|                                        | GABA EC <sub>50</sub> with 3.2 $\mu$ M etomidate, $\mu$ M | 1.9 $\pm$ 0.36             | 12 $\pm$ 0.71†                    | 34 $\pm$ 2.1†                     |
|                                        | EC <sub>50</sub> ratio (ctl/Eto)§                         | 14                         | 2.3 †                             | 0.95†                             |
| Etomidate direct activation (0 GABA)   |                                                           |                            |                                   |                                   |
|                                        | Etomidate EC <sub>50</sub> , $\mu$ M                      | 36 $\pm$ 1.1               | 78 $\pm$ 25                       | NA                                |
|                                        | Etomidate Hill slope                                      | 1.3 $\pm$ 0.54             | 1.7 $\pm$ 0.48                    | NA                                |
|                                        | Etomidate efficacy (fraction GABA max)                    | 0.43 $\pm$ 0.17            | 0.03 $\pm$ 0.011†                 | < 0.001†                          |

Errors are calculated in Origin 6.1 (OriginLab, Northampton, MA). *P* values for fit comparisons were assessed using GraphPad Prism 5.02 (GraphPad Software, San Diego, CA). Data and fitted logistic functions are graphically displayed in figures 1 and 2D.

\* Differs from wild-type at *P* < 0.05; † differs from wild-type at *P* < 0.005; ‡ fitted parameters from logistic fits to  $\gamma$ -aminobutyric acid (GABA) and etomidate concentration-response studies (figs. 1 and 2); § the EC<sub>50</sub> ratio is the ratio of GABA EC<sub>50</sub> in control experiments divided by the GABA EC<sub>50</sub> in the presence of 3.2  $\mu$ M etomidate.

NA = not applicable.

practice, the elements used to calculate  $P_{open}^{est}$  are all normalized to  $I_{max}^{GABA}$ :

$$P_{open}^{est} = \frac{I + I_{PTX}}{I_{GABA+Alphax} + I_{PTX}} = \frac{\frac{I}{I_{max}^{GABA}} + \frac{I_{PTX}}{I_{max}^{GABA}}}{\frac{I_{GABA+Alphax}}{I_{max}^{GABA}} + \frac{I_{PTX}}{I_{max}^{GABA}}} \quad (2)$$

Quantitative analysis based on Monod-Wyman-Changeux coagonism<sup>5</sup> was performed as follows: average  $P_{open}^{est}$  values calculated from GABA concentration-responses (with and without etomidate) and etomidate direct activation data were pooled. With both [GABA] and [etomidate] specified as independent variables, these data were globally fitted to equation 3 using nonlinear least squares:

$$P_{open} = \frac{1}{1 + I_0 \left( \frac{1 + [GABA]/K_G}{1 + [GABA]/cK_G} \right)^2 \left( \frac{1 + [ETO]/K_E}{1 + [ETO]/dK_E} \right)^2} \quad (3)$$

This equation describes a two-state equilibrium allosteric mechanism with two classes of agonist sites (one for GABA and one for etomidate), each with two equivalent sites.  $I_0$  in equation 3 is a dimensionless basal equilibrium gating variable, approximately  $P_0^{-1}$ .  $K_G$  and  $K_E$  are equilibrium dissociation constants for GABA and etomidate binding to inactive states, and  $c$  and  $d$  are dimensionless parameters representing the respective ratios of binding constants in active *versus* inactive states. The agonist efficacies of GABA and etomidate are inversely related to  $c$  and  $d$ , respectively.

To analyze membrane patch macrocurrents for activation, desensitization, and deactivation kinetics, data windows were specified in each trace for different phases of the waveform. Activation windows were from 10% above the baseline trace to a point where desensitization

had reduced the peak current by 3–5%. Desensitization windows were from the current peak to the end of GABA application. Deactivation windows were from the end of GABA application to the end of the sweep. Windowed data were fitted to multiple exponential functions using nonlinear least squares:

$$I(t) = A_1 \times \exp(-t/\tau_1) + A_2 \times \exp(-t/\tau_2) + A_3 \times \exp(-t/\tau_3) + C \quad (4)$$

The number of components for each fit was determined by comparison of single-, double-, and triple-exponential fits using an F test to choose the best exponential fit model with a confidence value of *P* = 0.99 (Clampfit8.0; Molecular Devices).

### Statistical Analysis

Results are reported as mean  $\pm$  SD unless otherwise indicated. Nonlinear regression errors are those from fits in Origin 6.1 (OriginLab). Statistical comparison of fitted parameters was performed using Prism 5.02 (GraphPad Software). Single parameter group comparisons were performed using either a two-tailed Student *t* test (with independent variances) or ANOVA with Tukey *post hoc* multiple comparisons test in Microsoft Excel (Microsoft Corporation, Redmond, WA) with an add-on statistical toolkit (StatistiXL; Nedlands, Australia). Statistical significance was inferred at *P* < 0.05.

## Results

### GABA Concentration-response Relationships and Etomidate Modulation

GABA concentration-responses with and without etomidate were measured in *Xenopus* oocytes and normal-

ized to  $I_{\text{GABA}}^{\text{max}}$  without etomidate (fig. 1, table 1). A logistic fit to pooled wild-type  $\alpha 1\beta 2\gamma 2\text{L}$  receptor data revealed a GABA  $\text{EC}_{50}$  of  $26 \mu\text{M}$  and a Hill slope of 1.2. Addition of  $3.2 \mu\text{M}$  etomidate dramatically enhanced currents elicited with low GABA, causing a 14-fold decrease in the wild-type GABA  $\text{EC}_{50}$  to  $1.9 \mu\text{M}$  and a small increase in the maximal GABA-activated current. Currents from  $\alpha 1\beta 2(\text{N265S})\gamma 2\text{L}$  receptors expressed in oocytes were characterized by GABA  $\text{EC}_{50} = 27 \mu\text{M}$ , which was not significantly different from that of wild-type ( $P = 0.67$ ). Addition of etomidate weakly enhanced currents elicited with low GABA and produced a 2.3-fold reduction in GABA  $\text{EC}_{50}$  to  $12 \mu\text{M}$ . This shift was significantly smaller than that observed in wild-type ( $P < 0.0001$ ). GABA-activated currents from  $\alpha 1\beta 2(\text{N265M})\gamma 2\text{L}$  receptors were characterized by an  $\text{EC}_{50}$  value of  $32 \mu\text{M}$ , significantly different from wild-type ( $P = 0.011$ ). Etomidate did not enhance GABA-activated currents from this mutant, and GABA  $\text{EC}_{50}$  in the presence of  $3.2 \mu\text{M}$  etomidate

was  $34 \mu\text{M}$ , not significantly different from GABA  $\text{EC}_{50}$  without etomidate ( $P = 0.64$ ).

#### *Etomidate Direct Activation*

Etomidate, in the absence of GABA, directly activated chloride currents in oocytes expressing wild-type  $\alpha 1\beta 2\gamma 2\text{L}$  GABA<sub>A</sub> receptors (fig. 2, table 1). Maximal direct activation averaged 43% of the maximal GABA-activated current ( $I_{\text{GABA}}^{\text{max}}$ ) and was observed at  $0.3 \text{ mM}$  etomidate. Half-maximal direct activation was at  $36 \mu\text{M}$  etomidate. In  $\alpha 1\beta 2(\text{N265S})\gamma 2\text{L}$  receptors, etomidate elicited small currents with maximum amplitude only 3% of that elicited by high GABA. Half-maximal direct activation in  $\alpha 1\beta 2(\text{N265S})\gamma 2\text{L}$  receptors was at about  $80 \mu\text{M}$  etomidate, but it was not significantly different from wild-type because of large uncertainty ( $P = 0.24$ ). Etomidate at up to  $1 \text{ mM}$  did not elicit any currents in oocytes expressing  $\alpha 1\beta 2(\text{N265M})\gamma 2\text{L}$  receptors.

#### *Maximal GABA Efficacy*

Maximal GABA efficacy was estimated by first activating receptors with a saturating concentration of GABA ( $10 \text{ mM}$ , approximately  $380 \times \text{EC}_{50}$ ), then adding  $2 \mu\text{M}$  alphaxalone (fig. 3). Alphaxalone more than doubled currents elicited with GABA concentrations below  $\text{EC}_{50}$ , showing that it is a strong positive modulator of all three receptors (not shown). In oocytes expressing wild-type  $\alpha 1\beta 2\gamma 2\text{L}$  receptors, alphaxalone enhanced maximal GABA currents on average by  $9 \pm 3.6\%$  ( $n = 8$ ). Alphaxalone enhanced maximal currents in receptors containing  $\beta 2(\text{N265S})$  and  $\beta 2(\text{N265M})$  mutations by  $7 \pm 3.2\%$  ( $n = 10$ ) and  $19 \pm 6.1\%$  ( $n = 7$ ), respectively. Assuming that  $10 \text{ mM}$  GABA plus alphaxalone activates all nondesensitized channels, we infer that GABA alone has an efficacy of  $0.92 \pm 0.030$  in wild-type,  $0.93 \pm 0.030$  in  $\alpha 1\beta 2(\text{N265S})\gamma 2\text{L}$ , and  $0.84 \pm 0.043$  in  $\alpha 1\beta 2(\text{N265M})\gamma 2\text{L}$ . The results for the  $\beta 2(\text{N265M})$  mutant demonstrate

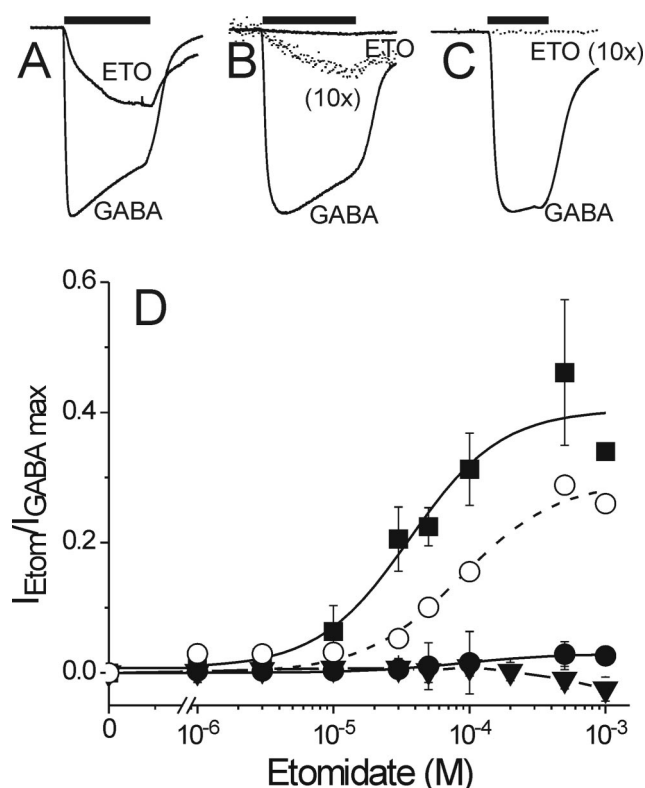

**Fig. 2.** Direct activation of  $\gamma$ -aminobutyric acid receptor type A (GABA<sub>A</sub>) receptor currents by etomidate (ETO, Etom). (A–C) Voltage-clamp currents elicited first with  $300 \mu\text{M}$  etomidate and then with  $1,000 \mu\text{M}$  GABA in oocytes. Small etomidate responses are magnified ten times (dotted sweeps). (A) Wild-type  $\alpha 1\beta 2\gamma 2\text{L}$  receptors. (B)  $\alpha 1\beta 2(\text{N265S})\gamma 2\text{L}$ . (C)  $\alpha 1\beta 2(\text{N265M})\gamma 2\text{L}$  10 x responses (open circles);  $\alpha 1\beta 2(\text{N265M})\gamma 2\text{L}$  (solid triangles). Lines through wild-type and  $\beta 2(\text{N265S})$  data represent nonlinear least squares fits to logistic functions. Fitted parameters are reported in table 1.

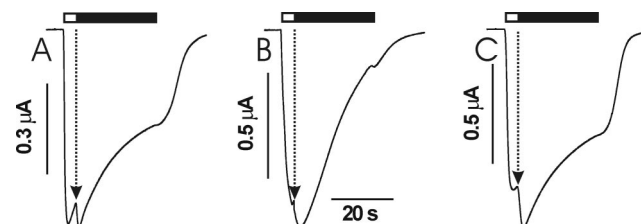

**Fig. 3.** The impact of  $\beta 2\text{N265}$  mutations on maximal  $\gamma$ -aminobutyric acid (GABA) efficacy. Each panel displays a voltage-clamp current sweep from an oocyte expressing different types of GABA receptor type A (GABA<sub>A</sub>) receptors. Currents were elicited first with  $10 \text{ mM}$  GABA for  $4 \text{ s}$  (open bar), then with  $10 \text{ mM}$  GABA plus  $2 \mu\text{M}$  alphaxalone (solid bar). Maximal GABA currents were enhanced by alphaxalone in all three receptors. The arrows point to the GABA current immediately before alphaxalone enhancement, which was used to calculate GABA efficacy. (A) Wild-type  $\alpha 1\beta 2\gamma 2\text{L}$ ; (B)  $\alpha 1\beta 2(\text{N265S})\gamma 2\text{L}$ ; (C)  $\alpha 1\beta 2(\text{N265M})\gamma 2\text{L}$ . Alphaxalone enhances  $\alpha 1\beta 2(\text{N265M})\gamma 2\text{L}$  more than wild-type or  $\alpha 1\beta 2(\text{N265S})\gamma 2\text{L}$  receptors, indicating that GABA efficacy is lower in  $\alpha 1\beta 2(\text{N265M})\gamma 2\text{L}$  than in the other channels.

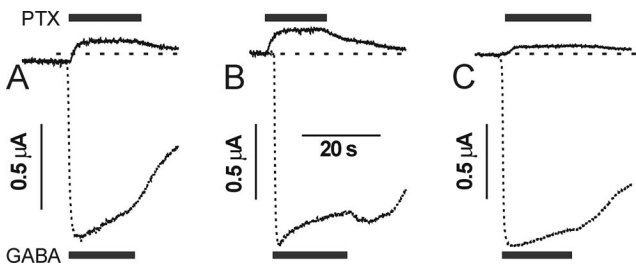

**Fig. 4.** Estimating the influence of  $\beta$ 2N265 mutations on basal channel gating. A mutation in the  $\alpha$ 1 subunit (L264T) was used to produce  $\gamma$ -aminobutyric acid receptor type A (GABA<sub>A</sub>) channels that open in the absence of GABA. A high concentration of picrotoxin (PTX; bars above sweeps indicate application) was applied to block spontaneously open channels, producing an apparent outward current, which was normalized to maximal GABA-activated current (GABA; bars below sweeps indicate application) for each type of receptor. (A) Wild-type  $\alpha$ 1(L264T) $\beta$ 2 $\gamma$ 2L; (B)  $\alpha$ 1(L264T) $\beta$ 2(N265S) $\gamma$ 2L; (C)  $\alpha$ 1(L264T) $\beta$ 2(N265M) $\gamma$ 2L.  $I_{PTX}/I_{GABA}$  is smaller for  $\alpha$ 1(L264T) $\beta$ 2(N265M) $\gamma$ 2L than for  $\alpha$ 1(L264T) $\beta$ 2 $\gamma$ 2L or  $\alpha$ 1(L264T) $\beta$ 2(N265S) $\gamma$ 2L receptors.

significantly lower GABA efficacy (ANOVA  $P < 0.001$ ) than either of the other two receptors. Wild-type and  $\beta$ 2(N265S) mutant results were not significantly different ( $P = 0.74$ ).

*Spontaneous Channel Activity*

Basal gating of all three receptors was assessed using picrotoxin, a potent GABA<sub>A</sub> receptor inhibitor. Picrotoxin did not significantly reduce resting oocyte leak currents in cells expressing any of the three receptors ( $n \geq 3$ ; data not shown). Given that maximal GABA currents in oocytes were as high as 7  $\mu$ A and our equipment can detect changes as small as 5 nA, we infer that the basal open probability of all three receptors is less than 0.1%. To more precisely quantify the effects of mutations on basal gating, we substituted wild-type  $\alpha$ 1 subunits with  $\alpha$ 1(L264T), containing a mutation that confers measurable basal gating activity (fig. 4). Picrotoxin (2 mM) produced an apparent outward current in  $\alpha$ 1(L264T) $\beta$ 2 $\gamma$ 2L receptors that averaged  $12 \pm 4.5\%$  ( $n = 7$ ) of maximal GABA response. In

oocytes expressing  $\alpha$ 1(L264T) $\beta$ 2(N265S) $\gamma$ 2L and  $\alpha$ 1(L264T) $\beta$ 2(N265M) $\gamma$ 2L receptors, picrotoxin produced apparent outward currents that averaged, respectively,  $15 \pm 7.0\%$  ( $n = 11$ ) and  $7 \pm 2.4\%$  ( $n = 7$ ) of maximal GABA currents. The  $\alpha$ 1(L264T) $\beta$ 2 $\gamma$ 2L and  $\alpha$ 1(L264T) $\beta$ 2(N265S) $\gamma$ 2L results were not significantly different (ANOVA  $P = 0.15$ ), whereas  $\alpha$ 1(L264T) $\beta$ 2(N265M) $\gamma$ 2L results differed significantly from the other two receptors ( $P = 0.0004$  vs. wt and  $P < 0.0001$  vs. N265M). These results indicate that the  $\beta$ 2(N265S) mutation causes little or no change in basal gating, while the  $\beta$ 2(N265M) mutation reduces basal gating probability approximately two-fold.

*Allosteric Coagonist Modeling*

Global mechanism-based analyses of oocyte data were performed as previously described.<sup>26</sup> An initial fit with all parameters free to vary was used to determine the  $L_0$  value for wild-type ( $25,000 \pm 9,000$ ). Our experimental results indicated that the  $\beta$ 2(N265S) mutation does not alter basal gating; therefore, the  $L_0$  value was constrained to equal the wild-type value in fitting  $\alpha$ 1 $\beta$ 2(N265S) $\gamma$ 2L receptor data (table 2). Our data indicated that the  $\beta$ 2(N265M) mutation reduced basal gating probability two-fold relative to wild-type channels; therefore, the  $L_0$  value for fitting  $\alpha$ 1 $\beta$ 2(N265M) $\gamma$ 2L data was fixed at twice that used for wild-type. Fits to calculated  $P_{open}^{est}$  data sets for both wild-type and  $\alpha$ 1 $\beta$ 2(N265S) $\gamma$ 2L converged for all four remaining free parameters in equation 3 (Methods).  $\alpha$ 1 $\beta$ 2(N265M) $\gamma$ 2L receptors are totally insensitive to etomidate; therefore, fits to  $P_{open}^{est}$  data for this receptor did not converge on values for either  $K_E$  or  $d$ . These parameters were removed from equation 3 for subsequent fit to  $\alpha$ 1 $\beta$ 2(N265M) $\gamma$ 2L data, resulting in well-determined parameters for both  $K_G$  and  $c$ . Results of the nonlinear least squares fits are reported in table 2 and displayed in figure 5.

**Table 2. Allosteric Coagonist Models for Wild-type and  $\beta$ 2N265 Mutant  $\gamma$ -aminobutyric acid receptor type A (GABA<sub>A</sub>) Receptors**

| Model Parameter†                                 | Receptor                         |                                         |                                         |
|--------------------------------------------------|----------------------------------|-----------------------------------------|-----------------------------------------|
|                                                  | $\alpha$ 1 $\beta$ 2 $\gamma$ 2L | $\alpha$ 1 $\beta$ 2(N265S) $\gamma$ 2L | $\alpha$ 1 $\beta$ 2(N265M) $\gamma$ 2L |
| $L_0$ (basal gating)‡                            | 25,000                           | 25,000                                  | 50,000                                  |
| $K_G$ (GABA dissociation constant), $\mu$ M      | $70 \pm 22$                      | $68 \pm 7.4$                            | $59 \pm 3.6$                            |
| $c^{-1}$ (GABA efficacy) §                       | $530 \pm 105$                    | $560 \pm 37$                            | $530 \pm 28$                            |
| $K_E$ (etomidate dissociation constant), $\mu$ M | $40 \pm 9.6$                     | $88 \pm 42$                             | NA                                      |
| $d^{-1}$ (etomidate efficacy)                    | $130 \pm 12$                     | $26 \pm 10.8^*$                         | NA                                      |

Errors are calculated in Origin6.1 (OriginLab, Northampton, MA).  $P$  values for fit comparisons were assessed using GraphPad Prism 5.02 (GraphPad Software, San Diego, CA). Data and results are graphically displayed in figure 5.

\* Differs from wild-type at  $P < 0.005$ . † Model parameters (equation 3, Methods) were fitted to estimated  $P_{open}$  data (equation 2, Methods) by using nonlinear least squares. ‡  $L_0$  values were fixed in the fits. The  $L_0$  value for fits to both wild-type and  $\alpha$ 1 $\beta$ 2(N265S) $\gamma$ 2L data was based on analysis of wild-type data where  $L_0$  was allowed to vary ( $L_0 = 25,000 \pm 9,000$ ). For fits to  $\alpha$ 1 $\beta$ 2(N265M) $\gamma$ 2L data, the value for  $L_0$  was set at twice the value used for wild-type, and  $K_E$  and  $d$  were removed from the fitting equation. § GABA efficacy is inversely related to  $c$ . || Etomidate efficacy is inversely related to  $d$ .

NA = not applicable.



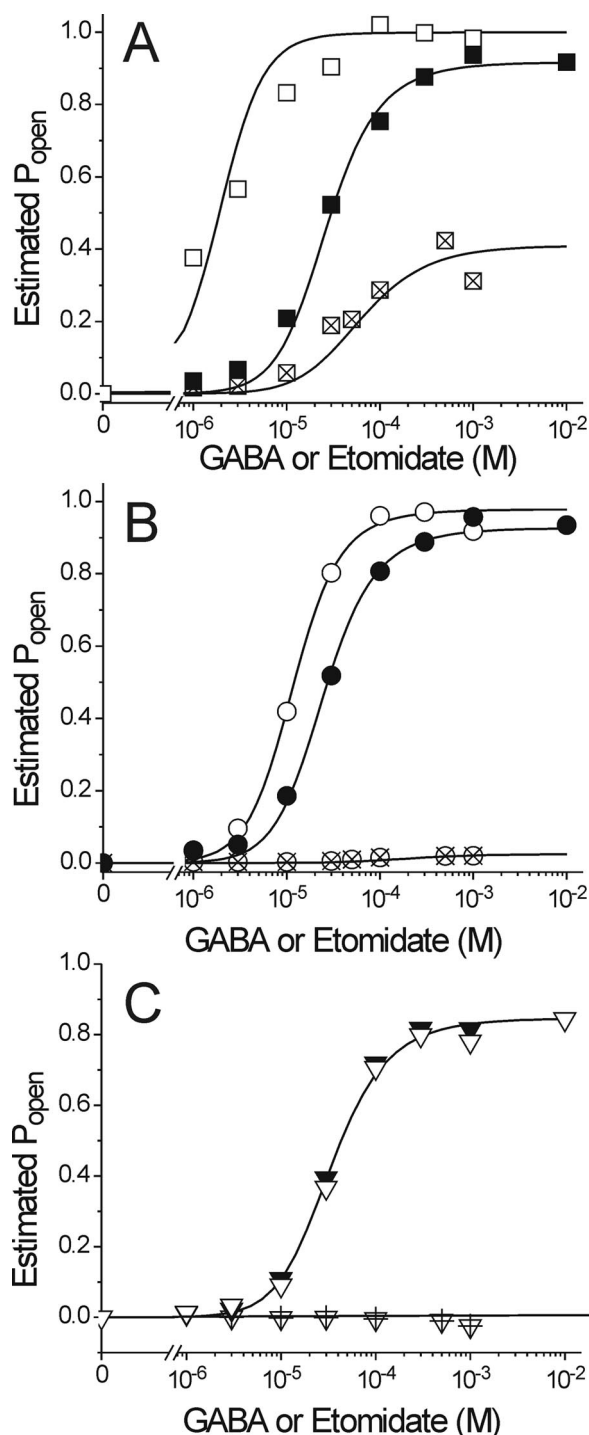

**Fig. 5.** Allosteric coagonist models for  $\gamma$ -aminobutyric acid (GABA) and etomidate-dependent receptor activation. Estimated open probabilities were calculated from mean normalized concentration-response data (figs. 1 and 2) using equation 2. *Solid symbols* represent control GABA concentration-responses, *open symbols* represent GABA responses in the presence of  $3.2 \mu\text{M}$  etomidate, and *cross-hatched symbols* represent etomidate direct activation responses. Combined data for each channel type were fitted with equation 3 (Methods), and results are plotted as *solid lines* in the panels. Fitted parameters are reported in table 2. (A) Wild-type  $\alpha 1\beta 2\gamma 2\text{L}$  (*square symbols*); (B)  $\alpha 1\beta 2(\text{N}265\text{S})\gamma 2\text{L}$  (*circles*); (C)  $\alpha 1\beta 2(\text{N}265\text{M})\gamma 2\text{L}$  (*triangles*).

### Macrocurrent Kinetics

GABA-activated currents in outside-out patches excised from transfected HEK293 cells were used to study macrocurrent kinetics of GABA<sub>A</sub> receptors (fig. 6, table 3). As previously reported,<sup>23</sup>  $\alpha 1\beta 2\gamma 2\text{L}$  wild-type currents elicited with high GABA concentrations display rapid activation, multiphasic desensitization, and biphasic deactivation after discontinuation of agonist. Currents elicited from patches expressing mutant receptors showed similar kinetics, which were analyzed in detail. For wild-type and both mutants, the best fit (F test;  $P = 0.99$ ) number of exponential deactivation phases was two in all patches, and the best-fit number of desensitization phases was two in the majority (18 of 23) of patches. Thus, for comparison, deactivation and desensitization phases of all patches were reanalyzed by using double-exponential functions. Statistical comparison with ANOVA indicates that fitted time constants for activation, desensitization, and deactivation are indistinguishable for all three types of receptor channels (table 3). Fast deactivation rate analysis suggested that this phase in  $\alpha 1\beta 2(\text{N}265\text{M})\gamma 2\text{L}$  may be faster than in wild-type receptors ( $59 \text{ s}^{-1}$  vs.  $42 \text{ s}^{-1}$ ), although this difference was not statistically significant ( $P = 0.15$ ).

### Etomidate Activation of Spontaneously Gating Receptors with $\beta 1$ versus $\beta 2$

A final set of experiments addressed the efficacy and potency of etomidate direct activation in spontaneously active receptors containing the  $\alpha 1(\text{L}264\text{T})$  mutation combined with  $\gamma 2\text{L}$  and either  $\beta 2$  or  $\beta 1$  subunits (fig. 7). Oocyte-expressed  $\alpha 1\beta 1\gamma 2\text{L}$  receptors displayed no detectable (less than 0.1%;  $n = 5$ ) picrotoxin-sensitive spontaneous activity and are characterized by GABA  $\text{EC}_{50} = 190 \mu\text{M}$  (fig. 7A, solid diamonds). Oocyte-expressed  $\alpha 1(\text{L}264\text{T})\beta 1\gamma 2\text{L}$  receptors display  $11 \pm 2.1\%$  ( $n = 5$ ) spontaneous activity and GABA  $\text{EC}_{50} = 3.8 \mu\text{M}$  (fig. 7A, open diamonds). High GABA responses are not significantly enhanced by alphaxalone in either  $\alpha 1(\text{L}264\text{T})\beta 1\gamma 2\text{L}$  or  $\alpha 1(\text{L}264\text{T})\beta 2\gamma 2\text{L}$  (not shown), indicating that maximal GABA efficacy in both gating mutant channels is near 1.0. Etomidate potently ( $\text{EC}_{50} = 0.8 \mu\text{M}$ ) activates  $\alpha 1(\text{L}264\text{T})\beta 2\gamma 2\text{L}$  receptors, with efficacy that is similar to GABA in these channels (fig. 7B, solid triangles). By using a value of 8 for  $L_0$  (calculated from  $I_{\text{PLX}}/I_{\text{GABA}}$  results; fig. 4) along with  $K_E = 40 \mu\text{M}$  and  $d = 0.0076$  from the wild-type  $\alpha 1\beta 2\gamma 2\text{L}$  global model fit (table 2), equation 3 closely predicts etomidate direct activation in  $\alpha 1(\text{L}264\text{T})\beta 2\gamma 2\text{L}$  receptors. In contrast, the etomidate  $\text{EC}_{50}$  for direct activation of  $\alpha 1(\text{L}264\text{T})\beta 1\gamma 2\text{L}$  receptors is  $43 \mu\text{M}$ , and maximal etomidate activation reaches about 60% of the maximal GABA response. The  $\alpha 1(\text{L}264\text{T})\beta 1\gamma 2\text{L}$  etomidate direct activation data were used to calculate  $P_{\text{open}}^{\text{est}}$  (equation 2, methods) and fitted with equation 3, resulting in  $L_0 = 9$ ,  $K_E = 58 \mu\text{M}$ , and  $d = 0.26$ . Our estimated parameters for etomidate bind-

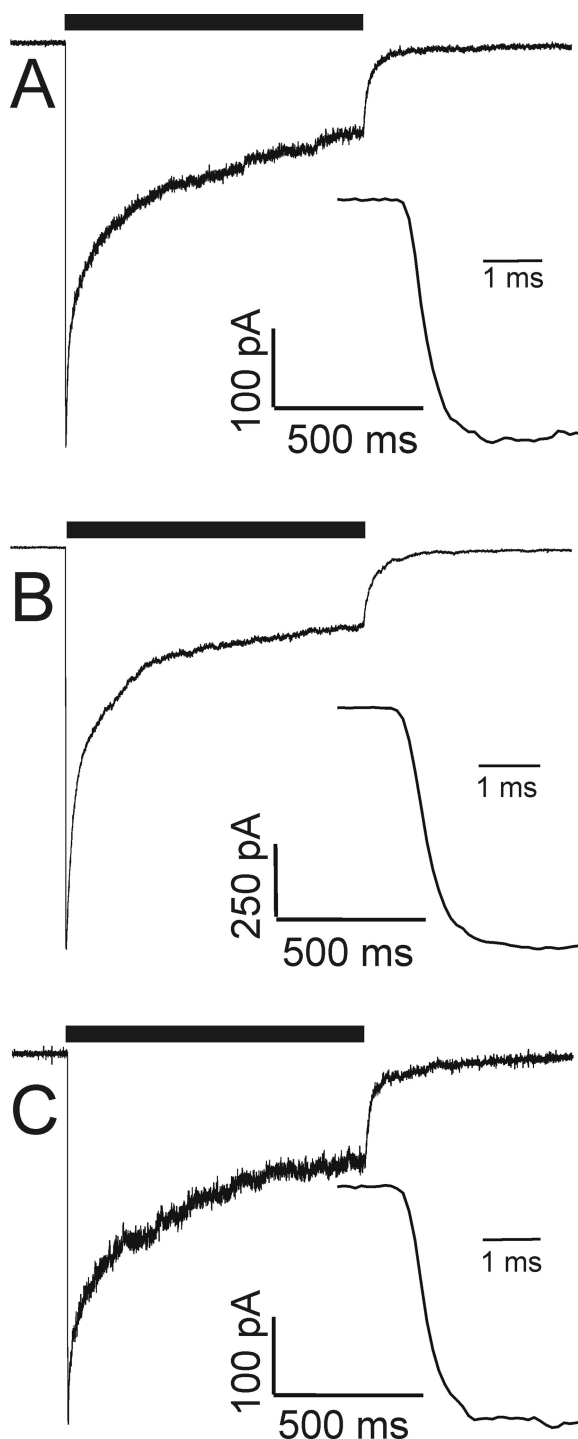

Fig. 6.  $\gamma$ -Aminobutyric acid receptor type A (GABA<sub>A</sub>) receptor current kinetics from rapidly superfused patch-clamp studies. Each panel displays a single current sweep recorded from a patch exposed to 1 mM GABA for 1 s (indicated by the bars over the current traces). Currents display three distinct phases that were analyzed separately: *activation* is the rapid evolution of GABA-activated inward current; *desensitization* is the drop in current during GABA application; and *deactivation* is the return to baseline after termination of GABA application. *Inset sweeps* display activation phases at an expanded scale. Results of kinetic analyses are summarized in table 3. (A) Wild-type  $\alpha 1\beta 2\gamma 2L$ ; (B)  $\alpha 1\beta 2(N265S)\gamma 2L$ ; (C)  $\alpha 1\beta 2(N265M)\gamma 2L$ .

ing to closed receptors containing  $\beta 1$  versus  $\beta 2$  subunits differ by less than 50% ( $K_E = 58 \mu M$  with  $\beta 1$  vs.  $40 \mu M$  with  $\beta 2$ ), whereas etomidate efficacy (inversely related to  $d$ ) is 34 times larger in  $\beta 2$ -containing receptors versus  $\beta 1$ -containing receptors ( $d^{-1} = 3.85$  with  $\beta 1$  vs.  $132$  with  $\beta 2$ ).

## Discussion

Our aim in this study was to better define the role of the  $\beta$  subunit residue at position 265 in GABA<sub>A</sub> receptor function in both the absence and presence of etomidate. Previous studies have reported diminished sensitivity to etomidate in heterologously expressed GABA<sub>A</sub> receptors containing either  $\beta 2$  or  $\beta 3$  subunits with N265S<sup>15</sup> or N265M mutations.<sup>13,16,17,27,28</sup> Unlike previously published reports, our experiments quantitatively assessed etomidate modulation of GABA activation as the ratio of GABA EC<sub>50</sub>s in the absence and presence of a standard etomidate concentration, a robust measure of positive allosteric modulation.<sup>25,29</sup> This approach demonstrates that, in  $\alpha 1\beta 2\gamma 2L$  GABA<sub>A</sub> receptors, the  $\beta 2(N265S)$  mutation reduces etomidate modulation by sixfold (2.3-fold shift vs. 14-fold for wild-type), whereas  $\beta 2(N265M)$  eliminates this shift entirely. We further tested the impact of the  $\beta 2N265$  mutations on direct receptor activation by etomidate. We found that etomidate elicits more than 40% of maximal GABA current in wild-type, about 3% in  $\alpha 1\beta 2(N265S)\gamma 2L$  receptors, and no detectable current in  $\alpha 1\beta 2(N265M)\gamma 2L$  receptors. Thus, the effect of the  $\beta 2N265$  mutations on etomidate direct activation parallels that on modulation of GABA responses. Previous studies have also noted that both direct etomidate activation and modulation of GABA responses are reduced in receptors containing  $\beta 1$  versus  $\beta 2$ <sup>12</sup> or those containing  $\beta 2/3(N265M)$  mutations.<sup>13</sup>

We also evaluated whether  $\beta 2N265$  mutations alter GABA<sub>A</sub> receptor gating in the absence of etomidate, including experiments to measure spontaneous (0 GABA) gating activity, GABA EC<sub>50</sub>, maximal GABA efficacy, and the macroscopic rates of transitions among major functional states. We found that none of these parameters was significantly altered by the  $\beta 2(N265S)$  mutations, whereas the  $\beta 2(N265M)$  mutation produced a 23% increase in GABA EC<sub>50</sub> (table 1), and also significantly reduced maximal GABA efficacy from 0.92 to 0.84. Whereas we could detect no spontaneous gating in wild-type,  $\alpha 1\beta 2(N265S)\gamma 2L$ , or  $\alpha 1\beta 2(N265M)\gamma 2L$  channels, novel experiments exploiting the spontaneously gating  $\alpha 1(L264T)\beta 2\gamma 2L$  mutant channel background reveal that substituting  $\beta 2(N265M)$  for  $\beta 2$  reduces basal gating activity by 50%, and substitution with  $\beta 2(N265S)$  causes no significant change. Analysis of GABA-activated current kinetics recorded using submillisecond concentration jumps shows that activation, desensitization, and



**Table 3.  $\beta 2N265$  Mutation Impact on GABA-stimulated Activation, Desensitization, and Deactivation Time Constants**

| Current Phase                    | Receptor                   |                                   |                                   |
|----------------------------------|----------------------------|-----------------------------------|-----------------------------------|
|                                  | $\alpha 1\beta 2\gamma 2L$ | $\alpha 1\beta 2(N265S)\gamma 2L$ | $\alpha 1\beta 2(N265M)\gamma 2L$ |
| Activation $\tau$ , ms (n)       | $0.61 \pm 0.34$ (7)        | $0.72 \pm 0.28$ (6)               | $0.63 \pm 0.18$ (6)               |
| Fast desensitization $\tau$ , ms | $33 \pm 9.7$               | $26 \pm 11$                       | $23 \pm 12$                       |
| Fraction fast (n)                | $0.4 \pm 0.09$ (5)         | $0.2 \pm 0.17$ (5)                | $0.2 \pm 0.09$ (5)                |
| Slow desensitization $\tau$ , ms | $1,300 \pm 430$            | $1,100 \pm 180$                   | $1,300 \pm 560$                   |
| Fraction slow (n)                | $0.6 \pm 0.09$ (5)         | $0.8 \pm 0.17$ (5)                | $0.8 \pm 0.09$ (5)                |
| Fast deactivation $\tau$ , ms    | $24 \pm 7.6$               | $21 \pm 3.9$                      | $17 \pm 8.7$                      |
| Fraction slow (n)                | $0.6 \pm 0.35$ (7)         | $0.5 \pm 0.30$ (6)                | $0.5 \pm 0.13$ (6)                |
| Slow deactivation $\tau$ , ms    | $210 \pm 140$              | $190 \pm 150$                     | $140 \pm 100$                     |
| Fraction fast (n)                | $0.4 \pm 0.35$ (7)         | $0.5 \pm 0.30$ (6)                | $0.5 \pm 0.13$ (6)                |

Results are mean  $\pm$  SD time constants ( $\tau$ ) for different phases of macrocurrents recorded by using rapid patch superfusion (n indicates number of patches analyzed). The activation phase (current growth during  $\gamma$ -aminobutyric acid [GABA] application) was fitted to single exponential functions by using nonlinear least squares regression. Desensitization (current decline during GABA application) and deactivation (current decline after GABA washout) phases were fitted to double exponential functions. Statistical comparisons performed by using ANOVA identified no differences that were significant at  $P < 0.05$ .

deactivation rates are not significantly altered by either  $\beta 2(N265S)$  or  $\beta 2(N265M)$ , although rapid deactivation tended to be faster in  $\alpha 1\beta 2(N265M)\gamma 2L$  receptors than in wild-type (table 3).

A number of previous studies have reported that  $\beta 2(N265M)$  or  $\beta 3(N265M)$  mutations increase GABA  $EC_{50}$ .<sup>16,17,28,30</sup> Nishikawa *et al.*<sup>30</sup> studied a series  $\beta 2N265$  mutations in  $\alpha 1\beta 2\gamma 2L$  receptors in HEK293 cells and found that GABA  $EC_{50}$  approximately doubled with  $\beta 2(N265M)$  and increased about 50% with  $\beta 2(N265S)$ . One previously published study by Miko *et al.*<sup>31</sup> investigated spontaneous gating in homomeric  $\beta 1$  GABA<sub>A</sub> receptors and the effects of  $\beta 1(S265)$  mutations. In that study, mutant  $\beta 3(N265S)$  subunits did not induce spontaneous gating in homomeric or heteromeric channels. No previous studies have assessed the influence of  $\beta 2N265$  or  $\beta 3N265$  mutations on macrocurrent kinetics in heterologously expressed channels. However, because GABA reuptake from synapses occurs in less than a millisecond,<sup>32</sup> GABAergic inhibitory postsynaptic current decay is largely dependent on channel deactivation. Reynolds *et al.*<sup>2</sup> reported that GABAergic miniature inhibitory postsynaptic current decays were similar in cerebellar Purkinje neurons from both wild-type and  $\beta 2(N265S)$  knock-in mice. Drexler *et al.*<sup>33</sup> found that inhibitory postsynaptic current decays in neocortical neurons of wild-type and  $\beta 3(N265M)$  knock-in mice were not significantly different. The subunit compositions of channels mediating these neuronal inhibitory postsynaptic currents is uncertain, but inhibitory postsynaptic current prolongation by etomidate was dramatically reduced in currents recorded from knock-in *versus* wild-type cells, demonstrating that GABA<sub>A</sub> receptors containing mutant  $\beta$  subunits were present. These results therefore indicate that *in vivo* neuronal GABA<sub>A</sub> channel kinetics are minimally altered by N265S and N265M mutations.

Allosteric gating models have proven useful for interpretation of how mutations alter the function of ligand-

gated ion channels.<sup>34,35</sup> We have used allosteric coagonist models to interpret both etomidate actions on GABA<sub>A</sub> receptors<sup>5</sup> and the effects of mutations on etomidate sensitivity,<sup>26</sup> and we have applied this approach here to analyze the impact of the  $\beta 2N265$  mutants we studied (fig. 5, table 2). Importantly, allosteric coagonist models appear to fit our wild-type and mutant data well, reinforcing the hypothesis that both etomidate modulation of GABA activation and direct etomidate activation of GABA<sub>A</sub> receptors are manifestations of interactions at a single class of etomidate sites observed under different experimental conditions.<sup>5</sup> After correcting  $L_0$  values according to our basal gating results, GABA binding ( $K_G$ ) and efficacy ( $c^{-1}$ ) parameters in all three fitted models (table 2) are all quite similar and not statistically different, suggesting that these mutations have little or no impact on GABA interactions. The total lack of etomidate effects in  $\alpha 1\beta 2(N265M)\gamma 2L$  receptors makes it impossible to fit etomidate binding and efficacy parameters in the allosteric model. However, comparison of coagonist model parameters for wild-type *versus*  $\alpha 1\beta 2(N265S)\gamma 2L$  receptors indicates that the  $\beta 2(N265S)$  mutation reduces etomidate efficacy ( $d^{-1}$ ) five-fold from wild-type, whereas etomidate binding ( $1/K_E$ ) affinity is reduced about two-fold.

Direct activation experiments using the gating mutant  $\alpha 1(L264T)$  expressed together with  $\beta 1$  *versus*  $\beta 2$  also addressed whether etomidate binding *versus* efficacy is affected by changing  $\beta$  subunit subtype. Combining the gating mutant  $L_0$  with fitted values for etomidate binding ( $K_E$ ) and efficacy ( $d$ ) from the  $\alpha 1\beta 2\gamma 2L$  model accurately predicts etomidate direct activation of  $\alpha 1(L264T)\beta 2\gamma 2L$  channels. This result suggests that the  $\alpha 1(L264T)$  mutation does not affect etomidate binding or efficacy, but simply sensitizes receptors to etomidate gating by increasing their tendency to open. Most importantly,  $\alpha 1(L264T)\beta 1\gamma 2L$  and  $\alpha 1(L264T)\beta 2\gamma 2L$  channels display similar spontaneous activity, but those with  $\beta 1$  subunits display less etomidate direct activation and much lower

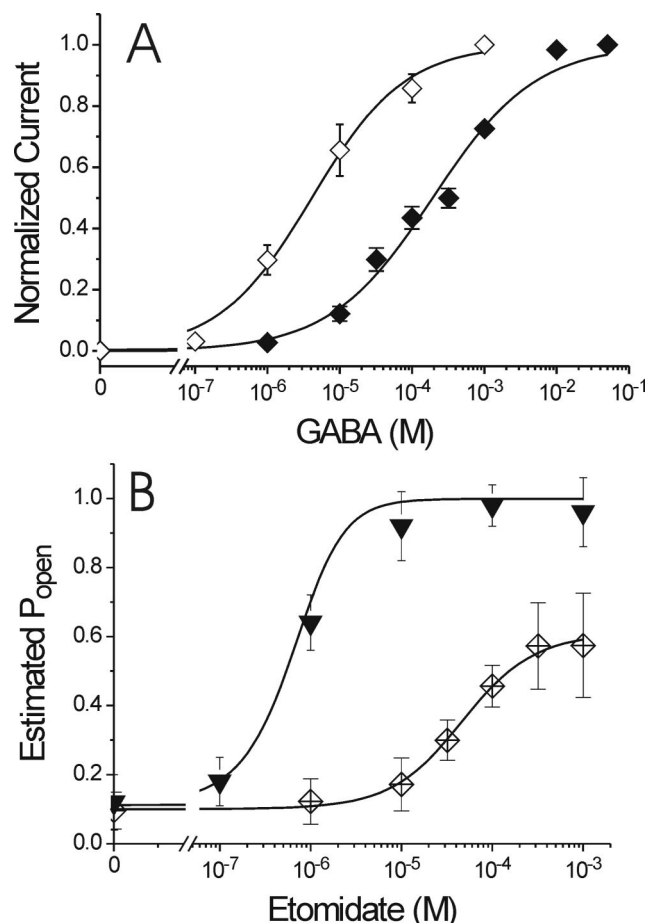

Fig. 7. The  $\alpha$ 1(L264T) gating mutation used to interpret etomidate interactions with  $\gamma$ -aminobutyric acid receptor type A (GABA<sub>A</sub>) receptors containing  $\beta$ 1 or  $\beta$ 2 subunits. **Panel A** depicts GABA concentration-response data (mean  $\pm$  SD) for oocytes expressing  $\alpha$ 1 $\beta$ 1 $\gamma$ 2L (solid diamonds) and  $\alpha$ 1(L264T) $\beta$ 1 $\gamma$ 2L receptors (open diamonds). Lines represent fits to logistic functions:  $\alpha$ 1 $\beta$ 1 $\gamma$ 2L GABA  $EC_{50}$  =  $190 \pm 32$   $\mu$ M, Hill slope =  $0.61 \pm 0.064$ ;  $\alpha$ 1(L264T) $\beta$ 1 $\gamma$ 2L GABA  $EC_{50}$  =  $3.8 \pm 0.43$   $\mu$ M, Hill slope =  $0.55 \pm 0.073$ . **(B)** Estimated  $P_{open}$  values (mean  $\pm$  SD) from etomidate concentration-response studies of both  $\alpha$ 1(L264T) $\beta$ 1 $\gamma$ 2L (crossed diamonds) and  $\alpha$ 1(L264T) $\beta$ 2 $\gamma$ 2L (solid triangles). Lines through  $\alpha$ 1(L264T) $\beta$ 1 $\gamma$ 2L points represent a nonlinear least squares fit to equation 3 with [GABA] = 0:  $L_0$  =  $9.1 \pm 0.84$ ,  $K_E$  =  $58 \pm 6.4$   $\mu$ M,  $d$  =  $0.26 \pm 0.038$ . The line through  $\alpha$ 1(L264T) $\beta$ 2 $\gamma$ 2L data are equation 3 with  $L_0$  = 8 and other values set at those derived for  $\alpha$ 1 $\beta$ 2 $\gamma$ 2L receptors ( $K_E$  = 40  $\mu$ M,  $d$  = 0.0076).

apparent affinity (etomidate  $EC_{50}$ ) than those with  $\beta$ 2 subunits. Allosteric mechanism analysis indicates that these changes are largely due to etomidate efficacy ( $d^{-1}$ ) that is 34-fold lower in  $\alpha$ 1(L264T) $\beta$ 1 $\gamma$ 2L *versus*  $\alpha$ 1(L264T) $\beta$ 2 $\gamma$ 2L.

The analysis of  $\beta$ 2N265 mutants contrasts with our recent study of tryptophan mutations at  $\alpha$ 1M236 and  $\beta$ 2M286,<sup>26</sup> and it is most consistent with the conclusion that  $\beta$ 2N265 is not a contact point for etomidate binding to GABA<sub>A</sub> receptors. Instead this residue may act as a transduction element between the etomidate sites and the ion channel. Other evidence also supports the conclusion that  $\beta$ 2N265 does not contribute to etomidate

binding. Recent structural models of the GABA<sub>A</sub> receptor transmembrane domains,<sup>11,18,19</sup> based on disulfide crosslinking and photolabeling data, depict  $\beta$ 2N265 located outside the intersubunit cleft where both etomidate and propofol bind. Furthermore, propofol does not protect cysteine substitutions at  $\beta$ 2N265 from covalent modification, whereas it does protect cysteine modification at  $\beta$ 2M286,<sup>36</sup> a site where there is abundant evidence for contact with etomidate.<sup>11,26</sup> An alternative interpretation of our findings is based on the concept of efficacy in allosteric gating models. Agonist (or coagonist) efficacy is the ratio of equilibrium binding dissociation constants in the two canonical states: active (open channel) *versus* inactive (closed channel). Thus, reduced etomidate efficacy in  $\beta$ 2N265 mutants implies reduced etomidate affinity for the transient open GABA<sub>A</sub> receptor state. This introduces the possibility that, although  $\beta$ 2N265 does not contribute to etomidate binding to inactive GABA<sub>A</sub> receptors, it might make contact with etomidate during channel opening. This interpretation also points out the importance of defining anesthetic binding determinants in more than one receptor state, a task that may be achieved using time-resolved photolabeling.<sup>37,38</sup>

Mutations that alter GABA<sub>A</sub> receptor anesthetic sensitivity *in vitro* represent potential tools for knock-in animal studies linking subunits to the various actions of anesthetics.<sup>39</sup> In this regard, the  $\beta$ 2(N265S) mutation is remarkable for reducing etomidate sensitivity without affecting basal or GABA-activated receptor activity. Indeed, Reynolds *et al.*<sup>2</sup> reported that  $\beta$ 2(N265S) knock-in mice have normal receptor expression, normal baseline and sleeping electroencephalographic activity, and normal baseline behavior. In comparison with  $\beta$ 2(N265S), the  $\beta$ 2(N265M) mutation produces two molecular effects: a small negative gating effect in the absence of etomidate combined with abolition of etomidate sensitivity. However, whereas the viability and general behavior of  $\beta$ 3(N265M) knock-in mice is apparently normal, no data have been published on their awake or sleeping electroencephalographic patterns or susceptibility to seizures. One behavioral study<sup>40</sup> reported that baseline freezing in response to a learned fear context was significantly lower in  $\beta$ 3(N265M) knock-ins *versus* wild-type mice.

GABA<sub>A</sub> receptor mutations with negative gating effects *in vitro*, such as  $\gamma$ 2(K289M), are associated with increased GABA  $EC_{50}$  and with epilepsy *in vivo*,<sup>41</sup> whereas gain-of-function mutations such as  $\alpha$ 1(S270H) reduce GABA  $EC_{50}$  and have been associated with grossly abnormal anatomic and behavioral phenotypes in knock-in animals.<sup>42</sup> Allosteric models illustrate that *in vitro* GABA  $EC_{50}$  is a function of baseline channel open probability ( $L_0$ ), GABA-binding affinity ( $K_G$ ), and efficacy ( $c$ ). A single mutation could simultaneously alter both  $L_0$  and

GABA efficacy, resulting in a near-normal GABA EC<sub>50</sub>, but significantly abnormal channel activity. Therefore, GABA EC<sub>50</sub> alone may be a misleading predictor of channel activity and *in vivo* phenotype. Assessment of basal gating changes and maximal GABA efficacy, together with GABA EC<sub>50</sub>, will provide a stronger basis for this prediction.

The authors thank Aiping Liu, M.S., Senior Technician, Department of Anesthesia & Critical Care, Massachusetts General Hospital, Boston, Massachusetts for technical assistance. They also thank Uwe Rudolph, M.D., Director of the Laboratory for Genetic Pharmacology, McLean Hospital, Belmont, Massachusetts, for his insights into knock-in animal phenotypes.

## References

- Jurd R, Arras M, Lambert S, Drexler B, Siegwart R, Crestani F, Zaugg M, Vogt KE, Ledermann B, Antkowiak B, Rudolph U: General anesthetic actions *in vivo* strongly attenuated by a point mutation in the GABA(A) receptor beta3 subunit. *FASEB J* 2003; 17:250-2
- Reynolds DS, Rosahl TW, Cirone J, O'Meara GF, Haythornthwaite A, Newmann RJ, Myers J, Sur C, Howell O, Rutter AR, Attack J, Macaulay AJ, Hadingham KL, Hutson PH, Belelli D, Lambert JJ, Dawson GR, McKernan R, Whiting PJ, Wafford KA: Sedation and anesthesia mediated by distinct GABA(A) receptor isoforms. *J Neurosci* 2003; 23:8608-17
- Yang J, Uchida I: Mechanisms of etomidate potentiation of GABAA receptor-gated currents in cultured postnatal hippocampal neurons. *Neuroscience* 1996; 73:69-78
- Zhong H, Rusch D, Forman SA: Photo-activated azi-etomidate, a general anesthetic photolabel, irreversibly enhances gating and desensitization of gamma-aminobutyric acid type A receptors. *ANESTHESIOLOGY* 2008; 108:103-12
- Rusch D, Zhong H, Forman SA: Gating allosterism at a single class of etomidate sites on alpha1beta2gamma2L GABA-A receptors accounts for both direct activation and agonist modulation. *J Biol Chem* 2004; 279:20982-92
- Sieghart W: Structure, pharmacology, and function of GABAA receptor subtypes. *Adv Pharmacol* 2006; 54:231-63
- Olsen RW, Sieghart W: International Union of Pharmacology. LXX. Subtypes of gamma-aminobutyric acid(A) receptors: Classification on the basis of subunit composition, pharmacology, and function. *Pharmacol Rev* 2008; 60:243-60
- Chang Y, Wang R, Barot S, Weiss DS: Stoichiometry of a recombinant GABAA receptor. *J Neurosci* 1996; 16:5415-24
- Baumann SW, Baur R, Sigel E: Forced subunit assembly in alpha1beta2gamma2 GABAA receptors. Insight into the absolute arrangement. *J Biol Chem* 2002; 277:46020-5
- Husain SS, Ziebell MR, Ruesch D, Hong F, Arevalo E, Kosterlitz JA, Olsen RW, Forman SA, Cohen JB, Miller KW: 2-(3-Methyl-3H-diaziren-3-yl)ethyl 1-(1-phenylethyl)-1H-imidazole-5-carboxylate: A derivative of the stereoselective general anesthetic etomidate for photolabeling ligand-gated ion channels. *J Med Chem* 2003; 46:1257-65
- Li GD, Chiara DC, Sawyer GW, Husain SS, Olsen RW, Cohen JB: Identification of a GABAA receptor anesthetic binding site at subunit interfaces by photolabeling with an etomidate analog. *J Neurosci* 2006; 26:11599-605
- Hill-Venning C, Belelli D, Peters JA, Lambert JJ: Subunit-dependent interaction of the general anaesthetic etomidate with the gamma-aminobutyric acid type A receptor. *Br J Pharmacol* 1997; 120:749-56
- Belelli D, Lambert JJ, Peters JA, Wafford K, Whiting PJ: The interaction of the general anesthetic etomidate with the gamma-aminobutyric acid type A receptor is influenced by a single amino acid. *Proc Natl Acad Sci USA* 1997; 94:11031-6
- Moody EJ, Knauer C, Granja R, Strakhova M, Skolnick P: Distinct loci mediate the direct and indirect actions of the anesthetic etomidate at GABA-A receptors. *J Neurochem* 1997; 69:1310-3
- Cestari IN, Min KT, Kulli JC, Yang J: Identification of an amino acid defining the distinct properties of murine beta1 and beta3 subunit-containing GABA(A) receptors. *J Neurochem* 2000; 74:827-38
- Pistis M, Belelli D, McGurk K, Peters JA, Lambert JJ: Complementary regulation of anaesthetic activation of human (alpha6beta3gamma2L) and *Drosophila* (RDL) GABA receptors by a single amino acid residue. *J Physiol (Lond)* 1999; 515:3-18
- Siegwart R, Jurd R, Rudolph U: Molecular determinants for the action of general anesthetics at recombinant alpha(2)beta(3)gamma(2)gamma-aminobutyric acid(A) receptors. *J Neurochem* 2002; 80:140-8
- Jansen M, Akabas MH: State-dependent cross-linking of the M2 and M3 segments: Functional basis for the alignment of GABAA and acetylcholine receptor M3 segments. *J Neurosci* 2006; 26:4492-9
- Bali M, Jansen M, Akabas MH: GABA-induced intersubunit conformational movement in the GABAA receptor alpha1M1-beta2M3 transmembrane subunit interface: Experimental basis for homology modeling of an intravenous anesthetic binding site. *J Neurosci* 2009; 29:3083-92
- Unwin N: Refined structure of the nicotinic acetylcholine receptor at 4A resolution. *J Mol Biol* 2005; 346:967-89
- Boileau AJ, Baur R, Sharkey LM, Sigel E, Czajkowski C: The relative amount of cRNA coding for gamma2 subunits affects stimulation by benzodiazepines in GABA(A) receptors expressed in *Xenopus* oocytes. *Neuropharmacology* 2002; 43:695-700
- Boileau AJ, Li T, Benkowitz C, Czajkowski C, Pearce RA: Effect of gamma2S subunit incorporation on GABAA receptor macroscopic kinetics. *Neuropharmacology* 2003; 44:1003-12
- Scheller M, Forman SA: Coupled and uncoupled gating and desensitization effects by pore domain mutations in GABA(A) receptors. *J Neurosci* 2002; 22:8411-21
- Rusch D, Forman SA: Classic benzodiazepines modulate the open-close equilibrium in alpha1beta2gamma2L gamma-aminobutyric acid type A receptors. *ANESTHESIOLOGY* 2005; 102:783-92
- Ehlert FJ: Analysis of allosterism in functional assays. *J Pharmacol Exp Ther* 2005; 315:740-54
- Stewart DS, Desai R, Cheng Q, Liu A, Forman SA: Tryptophan mutations at azi-etomidate photo-incorporation sites on alpha1 or beta2 subunits enhance GABAA receptor gating and reduce etomidate modulation. *Mol Pharmacol* 2008; 74:1687-95
- McGurk KA, Pistis M, Belelli D, Hope AG, Lambert JJ: The effect of a transmembrane amino acid on etomidate sensitivity of an invertebrate GABA receptor. *Br J Pharmacol* 1998; 124:13-20
- Siegwart R, Krahenbuhl K, Lambert S, Rudolph U: Mutational analysis of molecular requirements for the actions of general anaesthetics at the gamma-aminobutyric acidA receptor subtype, alpha1beta2gamma2. *BMC Pharmacol* 2003; 3:13
- Hall D: Modeling the functional effects of allosteric modulators at pharmacological receptors: An extension of the two-state model of receptor activation. *Mol Pharmacol* 2000; 58:1412-23
- Nishikawa K, Jenkins A, Parakevakis I, Harrison NL: Volatile anesthetic actions on the GABAA receptors: Contrasting effects of alpha 1(S270) and beta 2(N265) point mutations. *Neuropharmacology* 2002; 42:337-45
- Miko A, Werby E, Sun H, Healey J, Zhang L: A TM2 residue in the beta1 subunit determines spontaneous opening of homomeric and heteromeric gamma-aminobutyric acid-gated ion channels. *J Biol Chem* 2004; 279:22833-40
- Overstreet LS, Westbrook GL, Jones MV: Measuring and modeling the spatiotemporal profile of GABA at the synapse. *Transmembrane Transporters*. Edited by Quick MW. Hoboken, New Jersey: Wiley-Liss, 2002, pp 259-75
- Drexler B, Jurd R, Rudolph U, Antkowiak B: Dual actions of enflurane on postsynaptic currents abolished by the gamma-aminobutyric acid type A receptor beta3(N265M) point mutation. *ANESTHESIOLOGY* 2006; 105:297-304
- Changeux J, Edelstein SJ: Allosteric mechanisms in normal and pathological nicotinic acetylcholine receptors. *Curr Opin Neurobiol* 2001; 11:369-77
- Galzi JL, Edelstein SJ, Changeux J: The multiple phenotypes of allosteric receptor mutants. *Proc Natl Acad Sci USA* 1996; 93:1853-8
- Bali M, Akabas MH: Defining the propofol binding site location on the GABAA receptor. *Mol Pharmacol* 2004; 65:68-76
- Addona GH, Kloczewiak MA, Miller KW: Time-resolved photolabeling of membrane proteins: Application to the nicotinic acetylcholine receptor. *Anal Biochem* 1999; 267:135-40
- Arevalo E, Chiara DC, Forman SA, Cohen JB, Miller KW: Gating-enhanced accessibility of hydrophobic sites within the transmembrane region of the nicotinic acetylcholine receptor's (delta)-subunit. A time-resolved photolabeling study. *J Biol Chem* 2005; 280:13631-40
- Zeller A, Arras M, Jurd R, Rudolph U: Mapping the contribution of beta3-containing GABAA receptors to volatile and intravenous general anesthetic actions. *BMC Pharmacol* 2007; 7:2
- Liao M, Sonner JM, Jurd R, Rudolph U, Borghese CM, Harris RA, Laster MJ, Eger EI 2nd: Beta3-containing gamma-aminobutyric acidA receptors are not major targets for the amnesic and immobilizing actions of isoflurane. *Anesth Analg* 2005; 101:412-8
- Bianchi MT, Song L, Zhang H, Macdonald RL: Two different mechanisms of disinhibition produced by GABAA receptor mutations linked to epilepsy in humans. *J Neurosci* 2002; 22:5321-7
- Homanics GE, Elsen FP, Ying SW, Jenkins A, Ferguson C, Sloat B, Yuditskaya S, Goldstein PA, Kralic JE, Morrow AL, Harrison NL: A gain-of-function mutation in the GABA receptor produces synaptic and behavioral abnormalities in the mouse. *Genes Brain Behav* 2005; 4:10-9
